# Supplementary material
Source: PubMed Central journal article supplement (PMC196930)

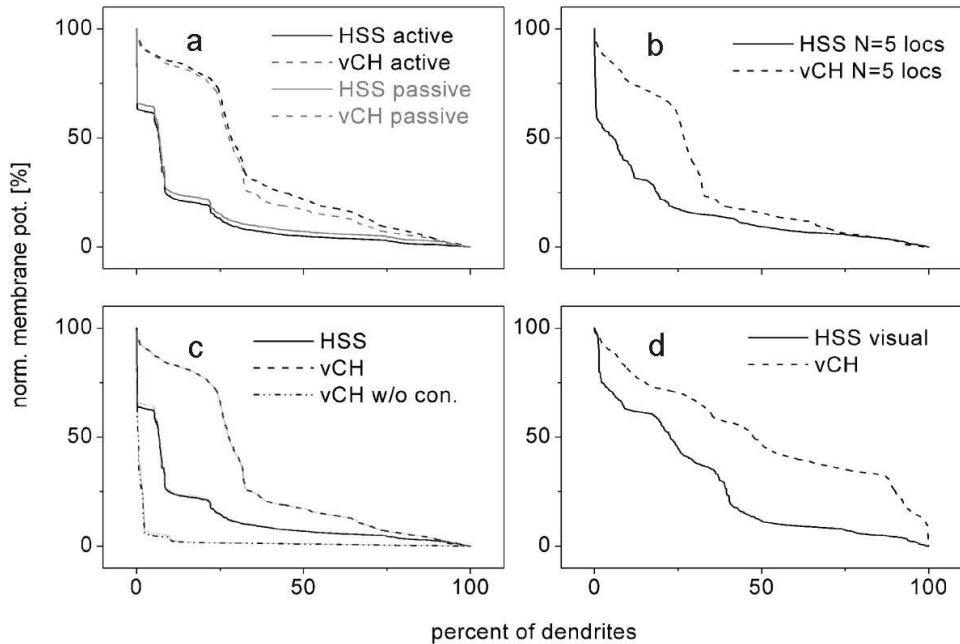

Supplement: pnas_100_19_11082__3.pdf [file pnas_100_19_11082__3.pdf]
